# Supplementary material for: Quantitative Entropy Weight TOPSIS Evaluation of Sustainable Chinese Wind Power Developments
Source: Hindawi journal article supplement (doi:10.1155/2018/6965439), 2018-09-30
Supplement: f1 [file 6965439.f1.pdf]

| Index layer                                                             | Unit                         | 2007     | 2008     | 2009     | 2010     | 2011     | 2012     | 2013      | 2014      | 2015      |
|-------------------------------------------------------------------------|------------------------------|----------|----------|----------|----------|----------|----------|-----------|-----------|-----------|
| National non-fossil fuel energy consumption accounts for primary energy | %                            | 7.5      | 8.4      | 8.5      | 9.4      | 8.4      | 9.7      | 10.2      | 11.3      | 11.4      |
| National energy consumption                                             | $\times 10^4$ t              | 265000   | 291000   | 306600   | 336126   | 360648   | 387043   | 402138    | 416913    | 425806    |
| National carbon dioxide emissions                                       | $\times 10^6$ t              | 6791.805 | 7035.444 | 7692.211 | 8256.969 | 9019.518 | 9819.518 | 10619.518 | 18619.518 | 26619.518 |
| National sulfur dioxide emissions                                       | $\times 10^4$ t              | 2468.1   | 2321.2   | 2214.4   | 2185.1   | 2217.9   | 2117.6   | 2043.9    | 1974.4    | 1859.1    |
| National waste water emissions                                          | $\times 10^4$ t              | 5568494  | 5716801  | 5890877  | 6172562  | 6591922  | 6847612  | 6954433   | 7161751   | 7353227   |
| National oxynitride emissions                                           | $\times 10^4$ t              | 2678.2   | 2650.2   | 2602.2   | 2503.2   | 2404.3   | 2337.8   | 2227.4    | 2078.0    | 1851.0    |
| Gross evaluated national wind power energy                              | w/m <sup>2</sup>             | 10       | 14       | 17       | 20       | 23       | 26       | 29        | 32.6      | 43.5      |
| Gross developable national wind power energy                            | m/s                          | 3        | 4.2      | 5.1      | 6        | 6.9      | 7.2      | 8.7       | 10        | 12        |
| National annual average temperature                                     | °C                           | 14.29    | 14.33    | 14.42    | 14.09    | 13.88    | 13.94    | 14.38     | 14.41     | 14.56     |
| National annual average precipitation                                   | $\times 10^8$ m <sup>3</sup> | 606.00   | 646.40   | 583.10   | 679.90   | 582.30   | 688.00   | 661.90    | 622.30    | 660.80    |
| National annual average humidity                                        | %                            | 63.68    | 63.65    | 63.58    | 64.68    | 63.35    | 64.90    | 64.58     | 65.32     | 66.52     |
| National wind power industry carbon dioxide emissions reductions        | $\times 10^4$ t              | 830.01   | 1659.26  | 3476.21  | 6239.28  | 8733.7   | 10733    | 12733     | 14733     | 16733     |
| National wind power industry sulfur dioxide emission reductions         | $\times 10^4$ t              | 0.59     | 1.18     | 2.47     | 4.36     | 6.2      | 8.2      | 10.2      | 12.2      | 14.2      |
| National wind power industry nitrogen oxide emission reductions         | $\times 10^4$ t              | 0.55     | 1.1      | 2.3      | 4.06     | 5.78     | 7.28     | 8.78      | 10.28     | 11.78     |
| National wind power industry water resources saved                      | $\times 10^8$ m <sup>3</sup> | 0.5      | 1        | 1.5      | 2        | 2.5      | 3        | 3.5       | 4         | 5         |
| National wind power industry energy consumption reductions (coal)       | $\times 10^4$ t              | 287.08   | 573.91   | 1202.35  | 2123.45  | 3020.81  | 3920     | 4820      | 5720      | 6620      |
| National total environmental protection investment                      | $\times 10^8$ CNY            | 3387.3   | 4937.03  | 5258.39  | 7612.19  | 7114.03  | 8253.46  | 9037.2    | 9575.5    | 8806.3    |
| National environmental investment accounts for GDP                      | %                            | 0.0125   | 0.0152   | 0.0151   | 0.0185   | 0.0147   | 0.0153   | 0.0153    | 0.0149    | 0.0128    |
| National population                                                     | $\times 10^4$ people         | 132129   | 132802   | 133450   | 134091   | 134735   | 135404   | 136072    | 136782    | 137462    |
| National GDP per capita                                                 | CNY                          | 20337    | 23912    | 25963    | 30567    | 36018    | 39544    | 41908     | 46652     | 49992     |
| National electricity consumption                                        | $\times 10^8$ kwh            | 32565    | 34380    | 36598    | 41999    | 47026    | 49657    | 53423     | 55637     | 56933     |
| National average wind abandoned ratio                                   | %                            | 0.08     | 0.09     | 0.1      | 0.1      | 0.1623   | 0.1712   | 0.1074    | 0.08      | 0.15      |
| National electricity accidents                                          | time                         | 248      | 232      | 212      | 196      | 125      | 96       | 84        | 73        | 60        |

|                                                                           |                     |         |         |         |         |         |         |         |         |         |
|---------------------------------------------------------------------------|---------------------|---------|---------|---------|---------|---------|---------|---------|---------|---------|
| National wind turbines offline time                                       | time                | 30      | 35      | 37      | 80      | 193     | 32      | 30      | 35      | 40      |
| National wind power industry installed capacity                           | $\times 10^4$ kwh   | 420     | 839     | 1760    | 2958    | 4623    | 6142    | 7652    | 9657    | 13075   |
| National wind power generating capacity                                   | $\times 10^4$ kwh   | 57.1    | 130.8   | 276.1   | 494     | 741     | 1031    | 1383    | 1598    | 1856    |
| National wind power industry's generating capacity accounts for the whole | %                   | 0.17    | 0.38    | 0.75    | 1.17    | 1.57    | 2.07    | 2.57    | 2.85    | 3.23    |
| Wind power equipment average available hours (above 6000 kv)              | hour                | 2010    | 2046    | 2077    | 2047    | 1875    | 1929    | 2025    | 1900    | 1724    |
| National wind power integration ratio                                     | %                   | 0.716   | 0.699   | 0.682   | 0.695   | 0.695   | 0.705   | 0.715   | 0.705   | 0.715   |
| National abandoned wind electricity                                       | $\times 10^8$ kwh   | 80      | 85      | 88      | 100     | 123     | 208     | 162     | 126     | 339     |
| National abandoned wind lost income                                       | $\times 10^8$ CNY   | 42.9    | 45.6    | 47.2    | 53      | 66      | 112     | 88      | 68      | 183     |
| National power supply line loss ratio                                     | %                   | 6.97    | 6.79    | 6.72    | 6.53    | 6.52    | 6.74    | 6.69    | 6.64    | 6.64    |
| National electricity reliability                                          | %                   | 0.998   | 0.998   | 0.999   | 0.999   | 0.999   | 0.998   | 0.999   | 0.999   | 0.999   |
| National power supply per capita                                          | kwh per capita      | 2476.99 | 2605.21 | 2765.18 | 3160.47 | 3519.45 | 3691.82 | 3957.66 | 4132.11 | 4175.66 |
| National wind power industry jobs                                         | $\times 10^4$ units | 20      | 22      | 25      | 28      | 30      | 32      | 36      | 40      | 50.9    |
| National total wind power investment                                      | $\times 10^8$ CNY   | 327.27  | 527.27  | 781.78  | 1038    | 902     | 607     | 650     | 915     | 1200    |
| National wind power policy                                                | unit                | 8       | 9       | 10      | 11      | 12      | 13      | 15      | 21      | 25      |
